# Supplementary material
Source: PubMed Central journal article supplement (PMC5100751)
Supplement: supp_pp.16.00801_PP2016-00801R1_Supplemental_Figures_and_Tables.pdf [file supp_pp.16.00801_PP2016-00801R1_Supplemental_Figures_and_Tables.pdf]

```

CPR1      1  -----MESKLELVRSIESALGVSLGEDNG----KVVVVVLTTSIAVI
CPR2      1  MDSSSEKLSPFELMSAILKGAKLDGNSSDSGVAVSPAVMAMLLENKELVMILTTSVAVL
CPR3      1  -----

CPR1     39  VGLVVFVWKRSTDRSKETKPVVVPKMSAHLLEEEEEEVDPSKVKVTVFFGTQTGTAEQFA
CPR2     61  IGCVVVLIWRRSSGSGK-KVVEPPKLIVPKSVVEPEEIDEGKKKFTIFFGTQTGTAEQFA
CPR3      1  -----MEEKPYEERILILLYASQTGNIDVA

CPR1     99  KALAEETIKARYEKAVKVIDIDDDYAADDDQYEEKLKKETLAFFMVATYGDGEPTDNAARF
CPR2    120  KALAEAKARYEKAVKVIDIDDDYAADDEYEEKERKETLAFFILATYGDGEPTDNAARF
CPR3     27  ERLREADRRCRCPVTLSI-----DDFDPRNLPDERTVIFVSTTGHGSDPSIKGF

CPR1    159  YKWFTEGKREPEWLOQLTYGVFGLGNROYEHFNKIGKVIDEQLSQOGAKRLVQLGLGDDD
CPR2    180  YKWFVEGNDRGDWLNLOYGVFGLGNROYEHFNKIAKVVEKVAEQGKRIVPLVLGDDD
CPR3     79  WRLLIQKNLSKDWLKGVYAVFGLGDSSYQKYNFVAKKLDRLLDLGTTAIVERGLGDDQ

CPR1    219  QCIEDDFAA--WRDQLWPELDQI---LRDEDDMISVSTPYTAAINEYRVVIH---DSLDT
CPR2    240  QCIEDDFAA--WRENWPELDNI---LRDEDDTT-VSTTYTAAIPEYRVVFPDKSDSLIS
CPR3    139  HPAGYDGLDPWISTLWNATYQKHPRLFPNGPDILTSGASMLDQPKVRITYH---SINDG

CPR1    271  PYEDRQLNGAN-----GNLSYDIHHPCIIVTAVQKELHKPESDRSCIHLEF
CPR2    294  EANGHANGYAN-----GNTVYDAQHPCRSNVAVRKELHTPASDRSCTHLDF
CPR3    196  THECSSAADFKFLEMQIDKTRSMSPGRYSLKSRPDCFVKMIKNYPLTREGCGKDVRHFEF

CPR1    317  DISGTGIQYETGDHVGVIYVNCNDENVEEAAKLLGQPLDLIFSLHADKEDGSSSLGGSLPPP
CPR2    340  DIAGTGLSYGTGDHVGVIYCDNLSEIVVEEAERLLNLPPEYFSLHADKEDGTPLAGSSLPP
CPR3    256  HAVSSSIEYEVGDVVEVLPQDPTSVDAFITRCNLNPDSYITVELIEEKDRVGNSEFRNW

CPR1    377  FPGPCSLRTAIALARYADLLTSPKKAALLALAAYTSEPSEAERLKFASLPQGKDDYSQWVVA
CPR2    400  PFPPCILRTAIALRYADLLNIPKKSALLALAAYASDPNEADRLKYLASPAKDEYAAQSLVA
CPR3    316  KVPVKLKNFVEYTMDDVASASPRRYFFEVMSFASSEHEKERLOYFASSEGRDDLYEYNQK

CPR1    437  SQRSLLEVMAEFPSAKPPLGVFFAAIAPRLPRYYSISSSPRFVPNRVHVTALVYGPTP
CPR2    460  NQRSLLEVMAEFPSAKPPLGVFFAAIAPRLQPRFYSISSSPRMAPSRITHVTALVYEKTP
CPR3    376  ERRTVLEVINDFPSVQMPFEWLVLV--PPLKTRAFSTASSNSAHPNQVHLTVSVVSWKTP

CPR1    497  TGRHKGVCSTWMKNAIPLERSPHCSKAPVFIKRTSNFKLPADPSVPIIMIGPGTGLAPFR
CPR2    520  GGRHKGVCSTWMKNAIPLERSRDCSWAPVFRQSNFKLPADPKVPVIMIGPGTGLAPFR
CPR3    435  YKRTRKGLCSTWLAGIDPQORVLVPAWFRKGYLP-----PPPPSLPLILIGPGTGCAFR

CPR1    557  GFLQERLVLKEEGAQLGPALFFFGCRNRKMDFIYEELKNFEDQGVISELI-----VAFS
CPR2    580  GFLQERLALKEEGAELGTAVFFFGCRNRKMDYIYEDELNHFLFICALISELI-----VAFS
CPR3    490  GFLERA-LQSKSCPTAPVLPVFFFGCRNEENDFIYKDFWLHLQKAGVFLFEEYGGGFYVAFS

CPR1    612  REGPQKEYVQHKMTEKAAQWLSLISEGGYLYVCGDAKGMARDVHRTLHTIVQEQ--EKAD
CPR2    635  REGPTKQYVQHKMAEKASDIWRMISDGAYVYVCGDAKGMARDVHRTLHTIAQEQ--GSMD
CPR3    549  RQQPQKVYVQHKMREQSEKIWIWLFQAQAAVYVAGSANKMPADVLSAFEEIMGQRSGEQAG

CPR1    670  SSKAEAVVKKLQMDGRYL RDVW-
CPR2    693  SIQAEVFKNLQMTGRYL RDVW-
CPR3    609  LRYFRALVKA----GKYHVEAWS

```

**Supplemental Figure 1. Alignment of periwinkle CPR1, CPR2 and CPR3 deduced amino-acid sequences.** Identity and similarity are show with black and grey highlighting respectively.

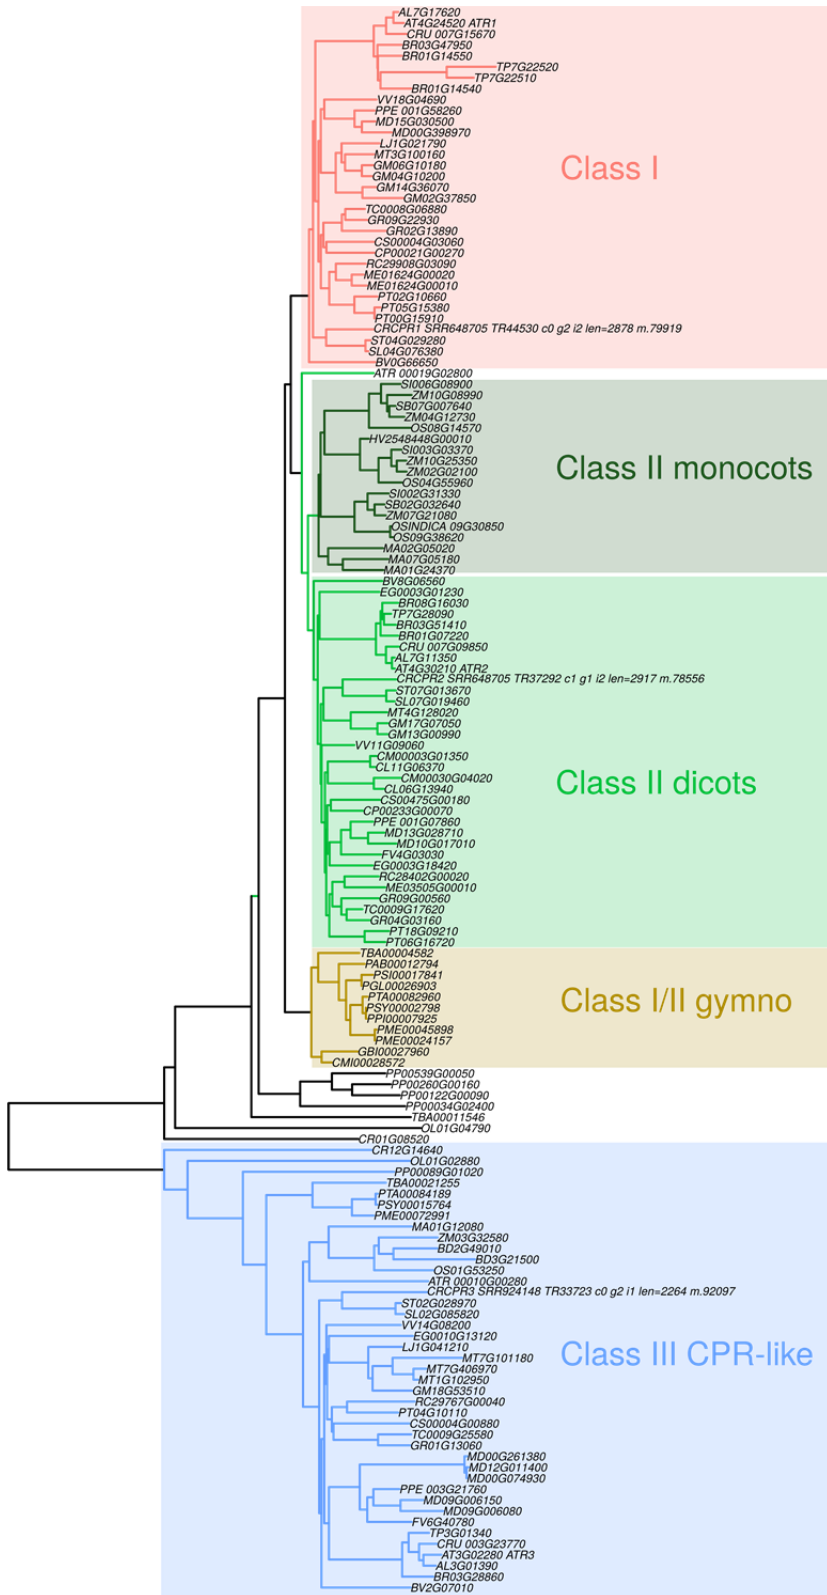

**Supplemental Figure 2. CPR phylogenetic tree.** CPR sequences from Arabidopsis (ATR1 AT4G24520, ATR2 AT4G30210 and ATR3 AT3G02280) were used to find orthologs (blastx) in the PLAZA Dicotyledons v3.0, Monocotyledons v3.0 and Gymnosperm v1.0 databases (<http://bioinformatics.psb.ugent.be/plaza/>). Protein sequences of orthologs were obtained from pre-computed subfamilies ORTHO03D000287, ORTHO03D000526, ORTHO03D003816, ORTHO03D005981, ORTHO03M000764, ORTHO03M005434, ORTHO03M144957, ORTHO03M151063, ORTHO03M193943. Unique identifiers and sequences were prepared with the 'seqinr' R package. A phylogenetic tree was built with NCBI COBALT tool using a Fast Minimum Evolution tree (Desper R and Gascuel O, Mol Biol Evol 21:587-98, 2004) and default parameters. CRCPR=CPR sequences from *Catharanthus roseus*. All other identifiers are described on the web server of PLAZA.

A- CPR1 (CRO\_T001672)-cro\_scaffold\_297268

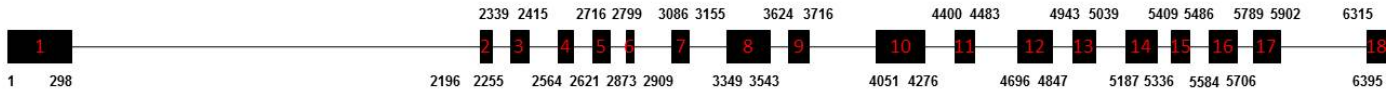

B- CPR2 (CRO\_T031702)-cro\_scaffold\_3013425

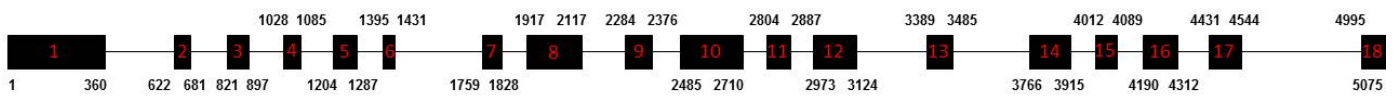

C- CPR3 (CRO\_T033752)-cro\_scaffold\_2982366

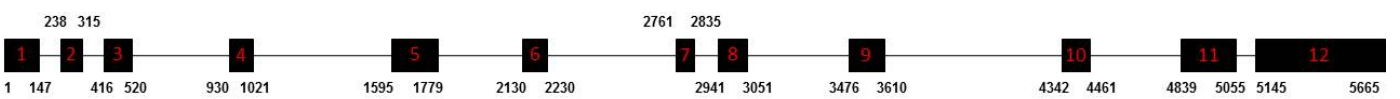

**Supplemental Figure 3.** Gene organizations of CPR1, CPR2 and CPR3/DFR. Exons and introns are indicated by boxes and solid lines, respectively.

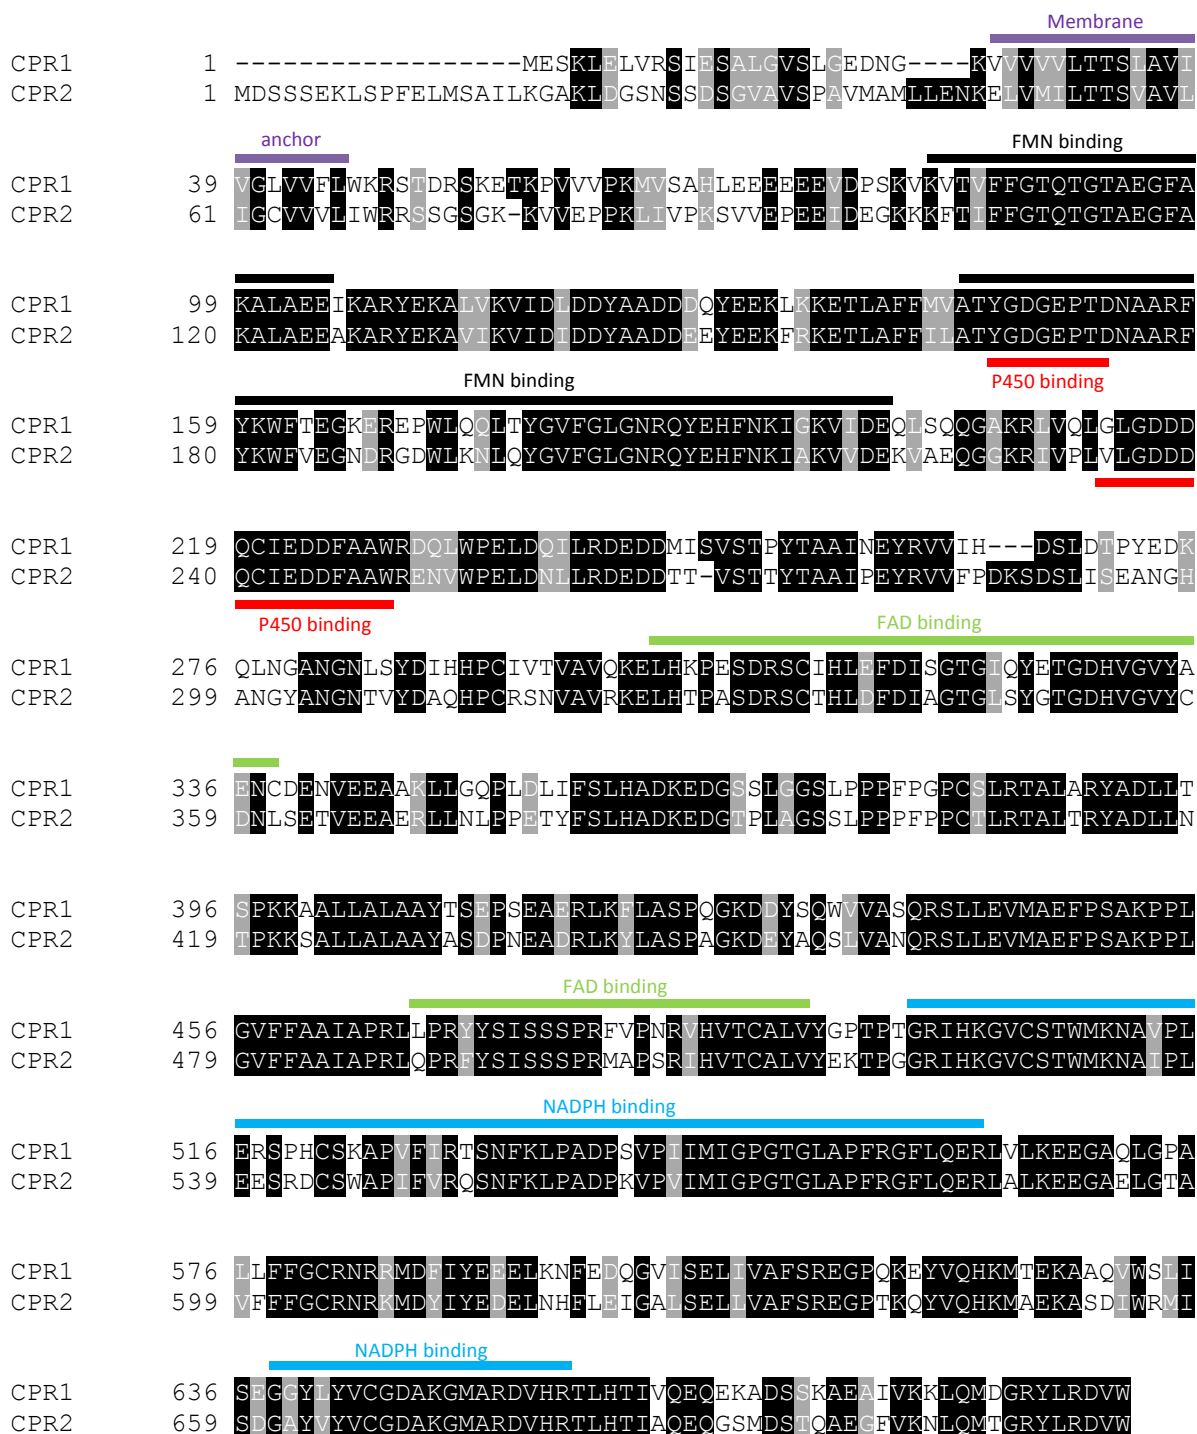

**Supplemental Figure 4. Alignment of CPR1 and CPR2 amino-acid sequences highlighting characteristic membrane anchor, FMN, FAD, NADPH and P450-binding domains.**

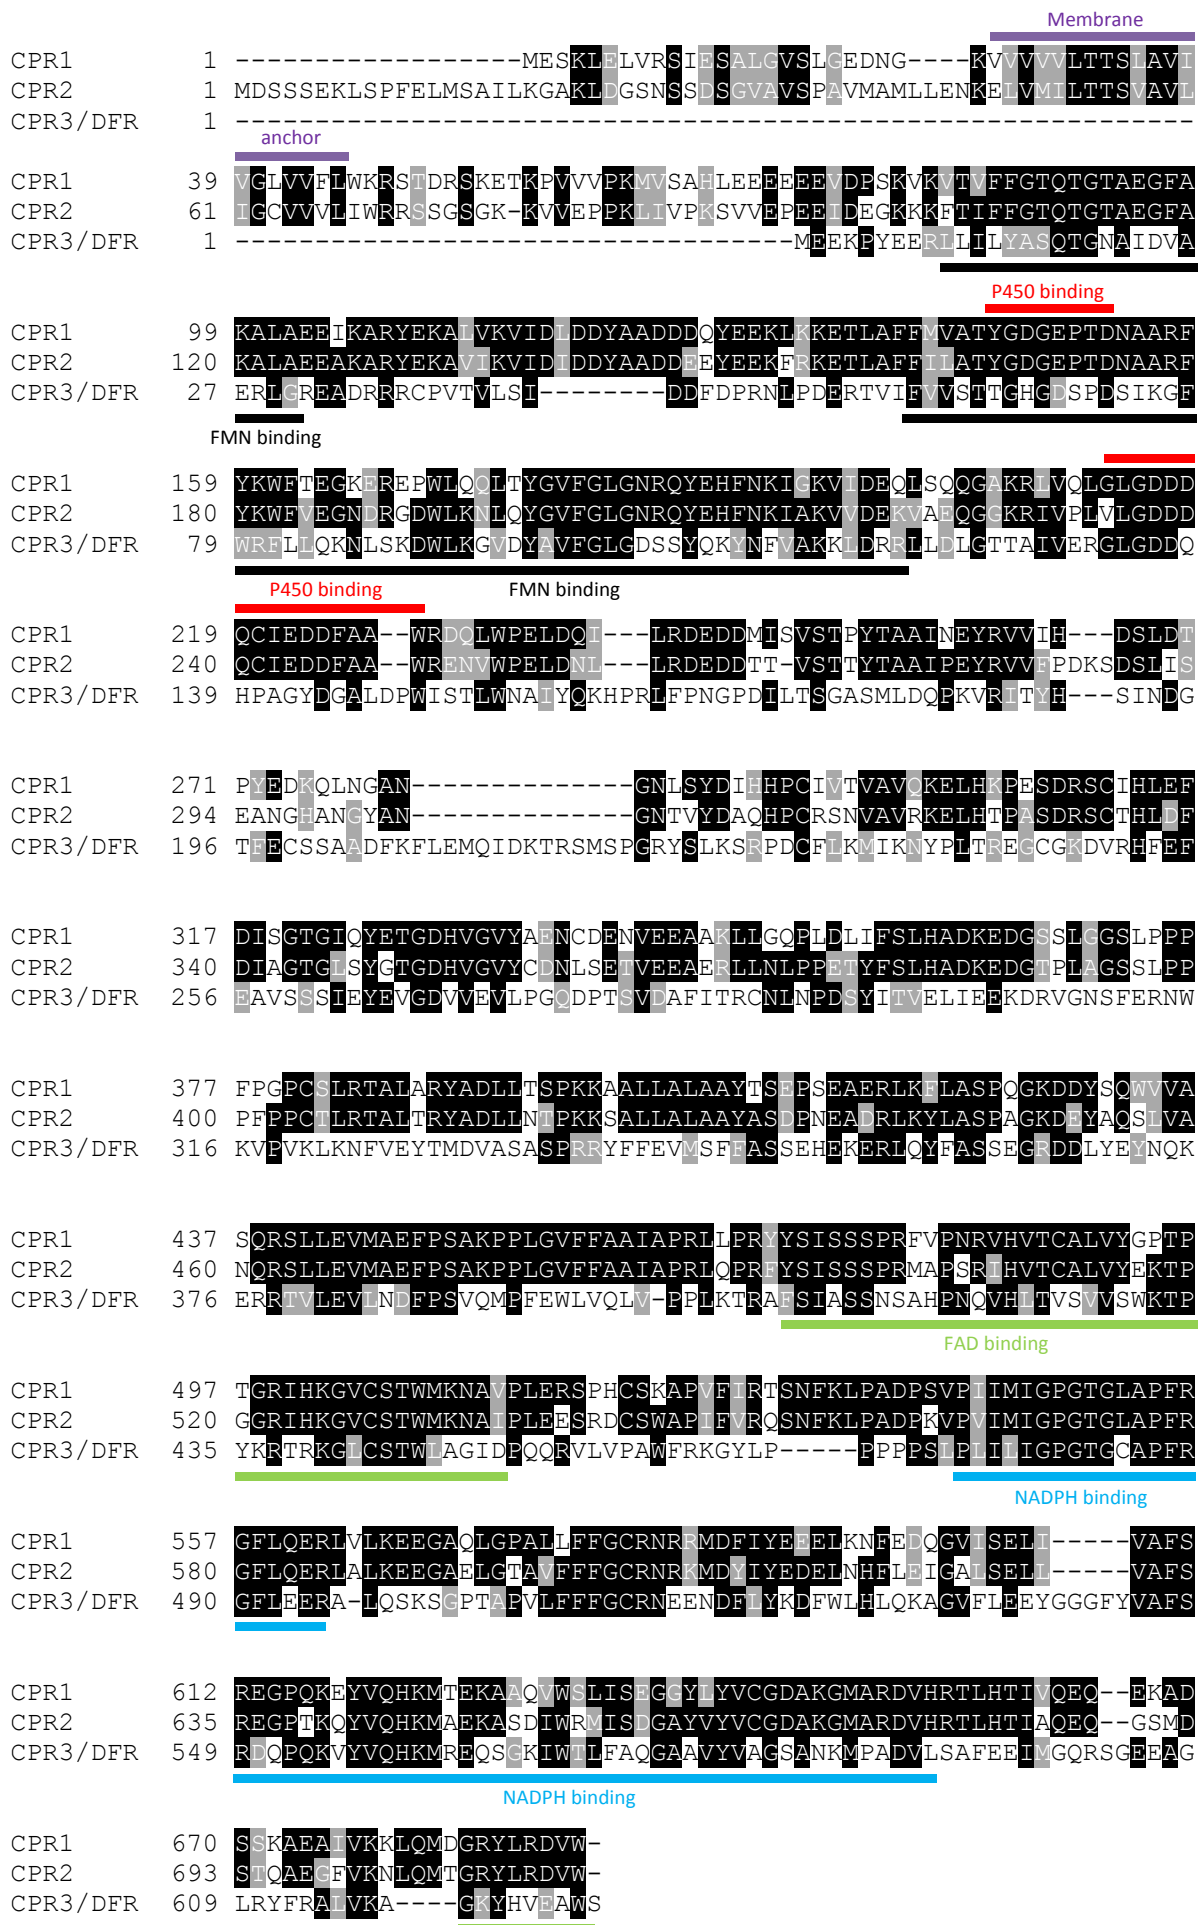

**Supplemental Figure 5. Alignment of periwinkle CPR1, CPR2 and CPR3/DFR deduced amino-acid sequences and determination of the putative functional domains of CPR3 according to Varadarajan et al. (2010).**

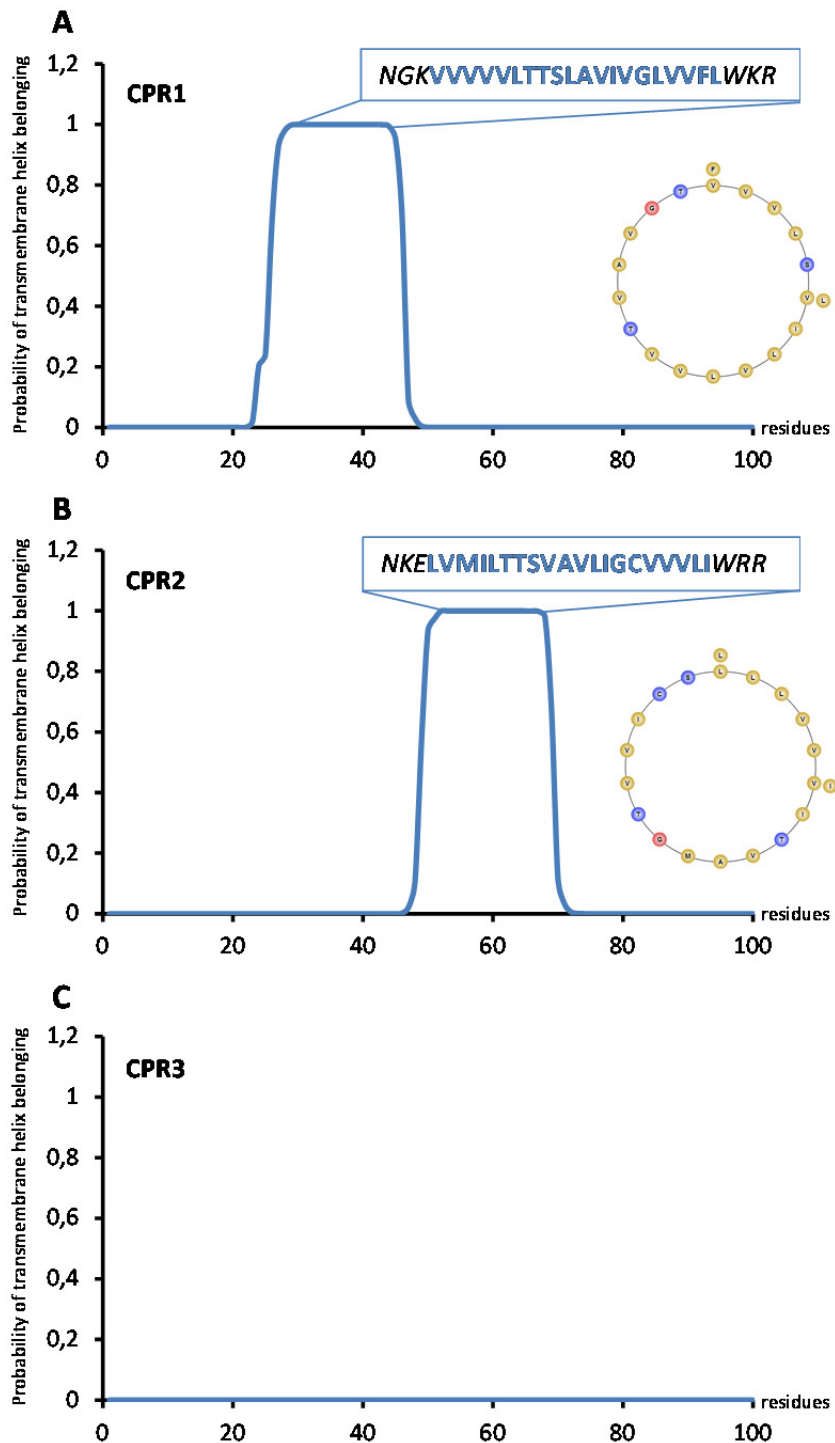

**Supplemental Figure 6. Detection of a putative transmembrane helix at the N-terminal end of CPR1 (A), CPR2 (B) and CPR3/DFR (C).** Probability of a residue to belong to a transmembrane helix as calculated for the 100-first amino acids of each CPR with a Markov model by the TMHMM server. Projection of the helical wheel has been done using [http://www-nmr.cabm.rutgers.edu/bioinformatics/Proteomic\\_tools/Helical\\_wheel/](http://www-nmr.cabm.rutgers.edu/bioinformatics/Proteomic_tools/Helical_wheel/).

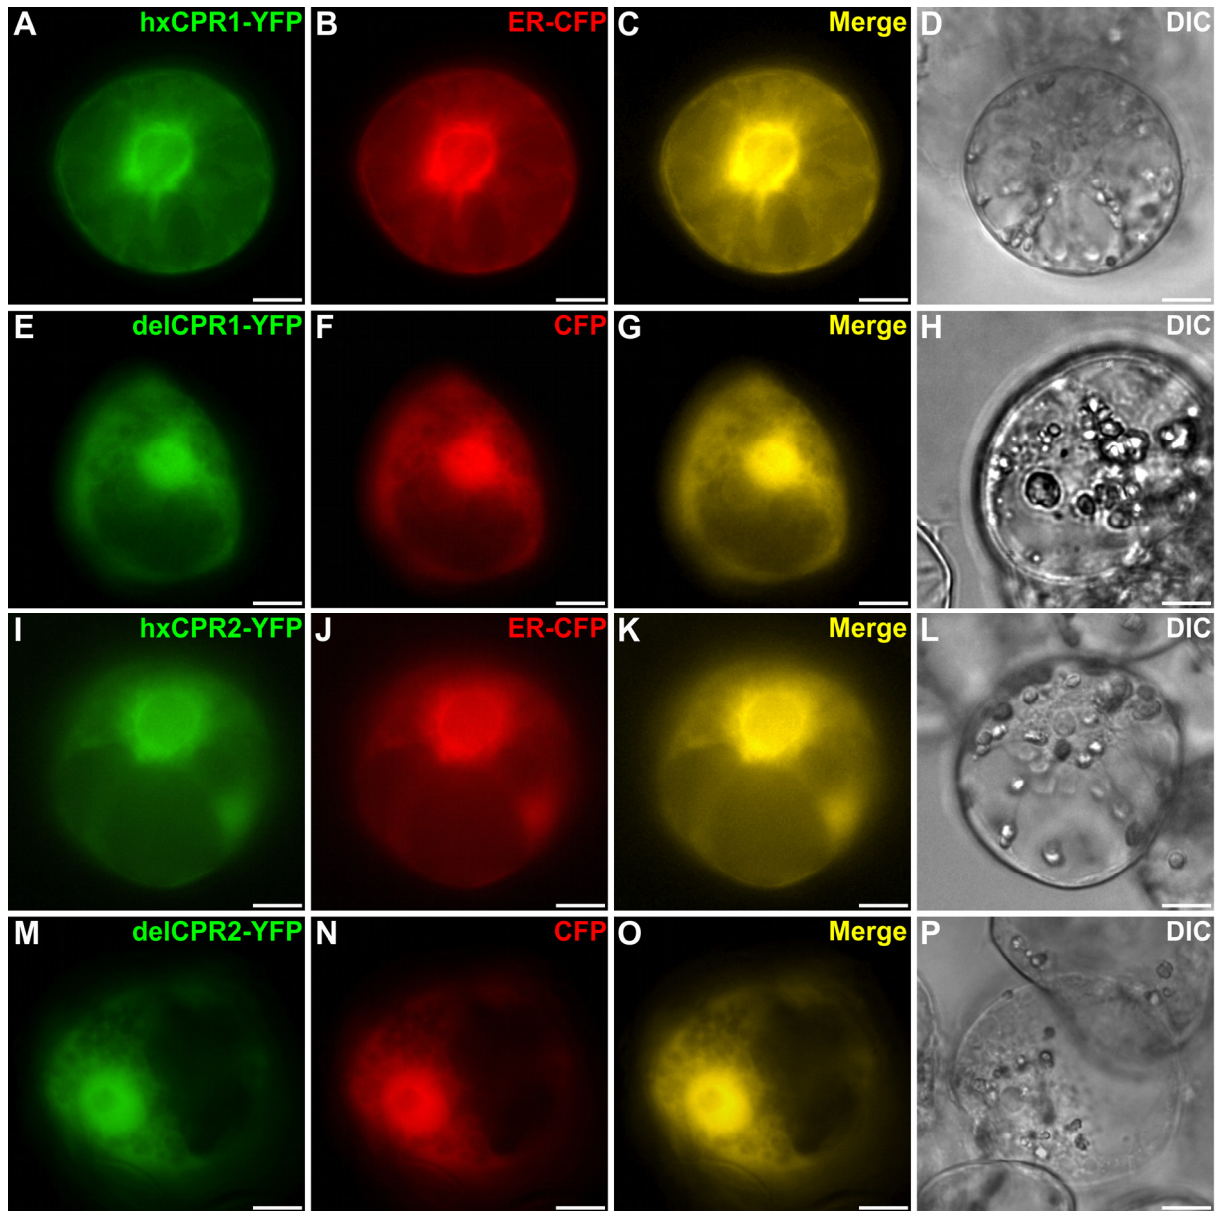

**Supplemental Figure 7. Characterization of the membrane anchoring domain of CPR1 and CPR2.** *C. roseus* cells were transiently transformed with plasmids expressing hxCPR1-YFP (A) corresponding to the first 53 residues of CPR1 fused to YFP, delCPR1-YFP corresponding to the remaining part of CPR1 (AA 54-691) fused to YFP (E), hxCPR2-YFP (I) corresponding to the first 74 residues of CPR2 fused to YFP or delCPR2-YFP corresponding to the remaining part of CPR2 (AA75-715) fused to YFP (M) in combination with plasmids expressing either an ER-CFP marker ("ER"-CFP; B, I) or a nucleocytosolic marker (CFP; F, N). Colocalization of the fluorescent signals appears on the merged images (C, G, K, O). Cell morphologies (D, H, L, P) were observed with differential interference contrast (DIC). Bars, 10  $\mu$ m.

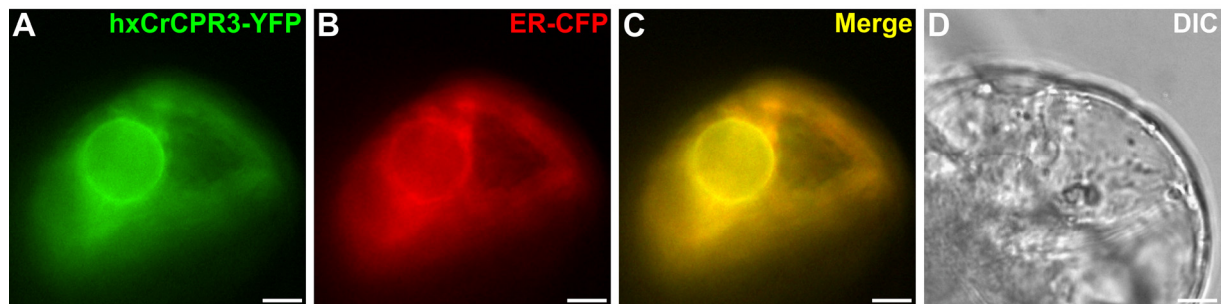

**Supplemental Figure 8. Addition of the CPR2 membrane anchoring domain to CPR3 enables ER anchoring.** *C. roseus* cells were transiently transformed with the plasmid pSCA-hxCPR3-YFP hxCPR1-YFP (A) in combination with the plasmid expressing the ER-CFP marker ("ER"-CFP; B). Colocalization of the fluorescent signals appears on the merged images (C). Cell morphology (D) was observed with differential interference contrast (DIC). Bars, 10  $\mu$ m.



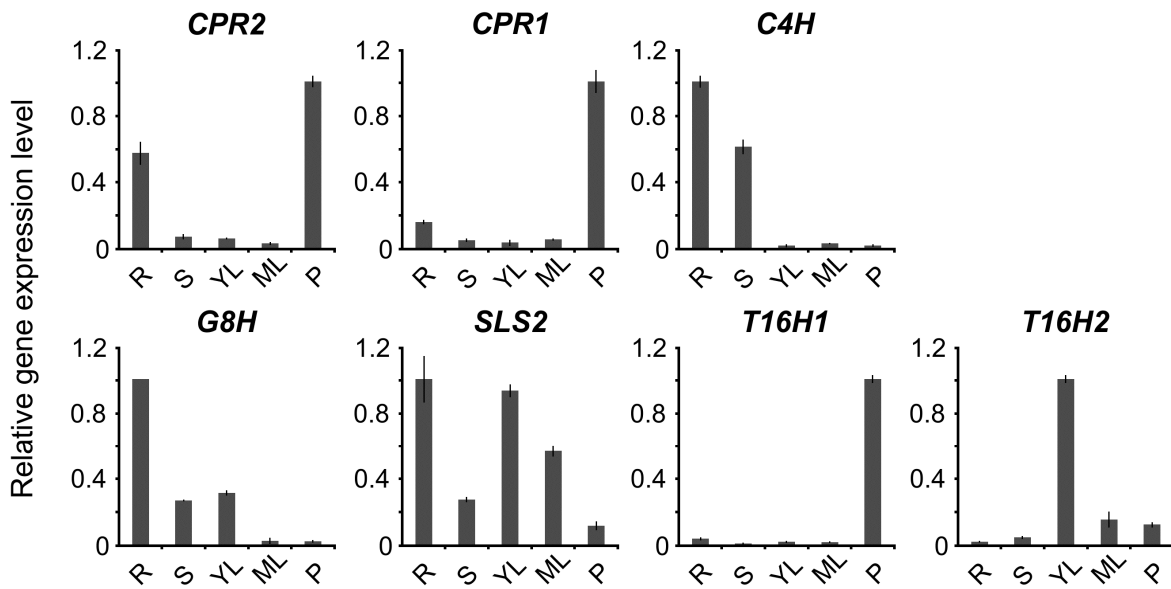

**Supplemental Figure 9. Transcript distribution of CPR1, CPR2, C4H, G8H, SLS2, T16H1 and T16H2 in various *C. roseus* organs.** Relative expression of each gene was determined by real-time RTPCR analyses performed on total RNA extracted from various *C. roseus* organs including roots (R), stems (S), young leaves (YL), mature leaves (ML) and petals (P). RPS9 was used as a reference gene.

**TPM-no transformation**

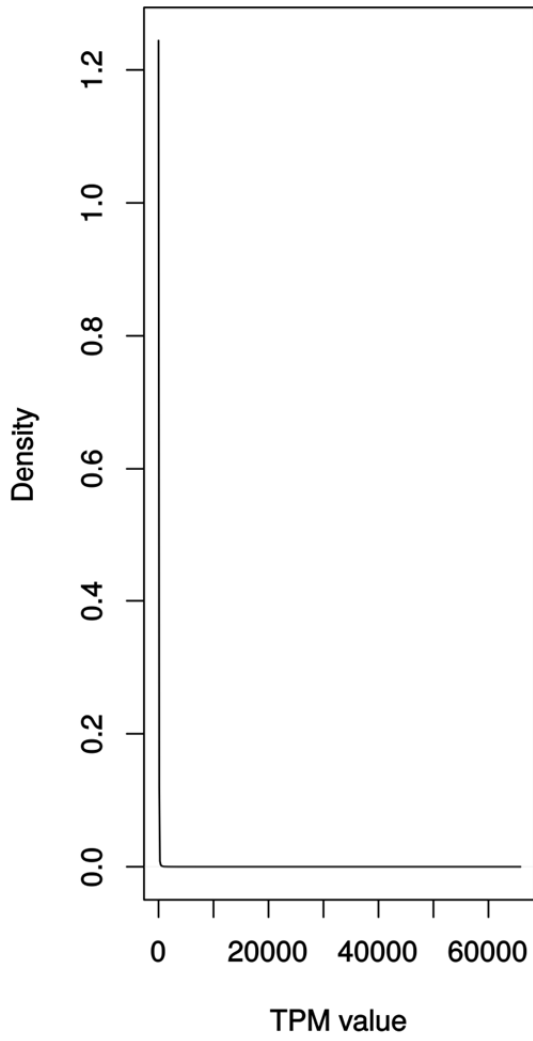

**TPM-log2 transformed**

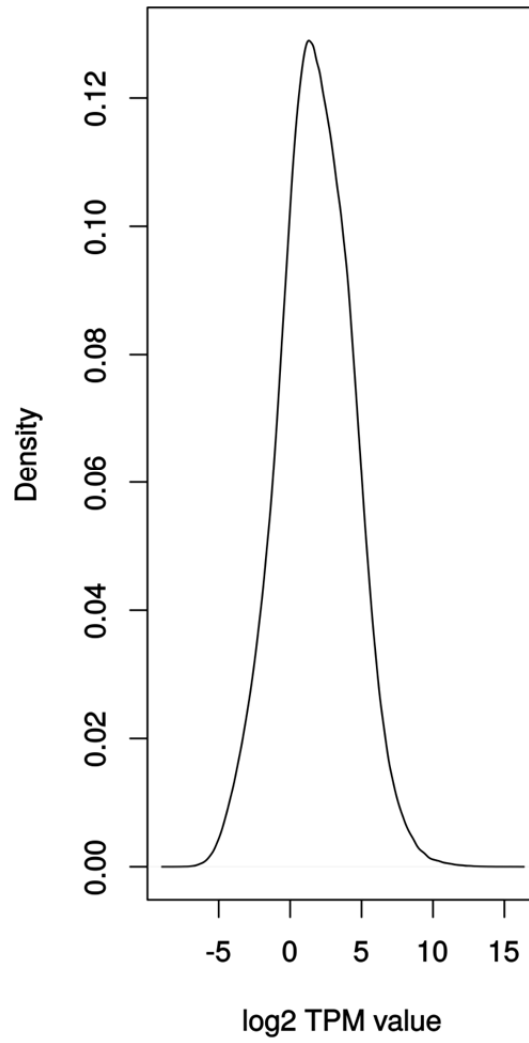

**Supplemental Figure 10. Distribution of TPM.** Normality was observed after transforming TPM with log2.

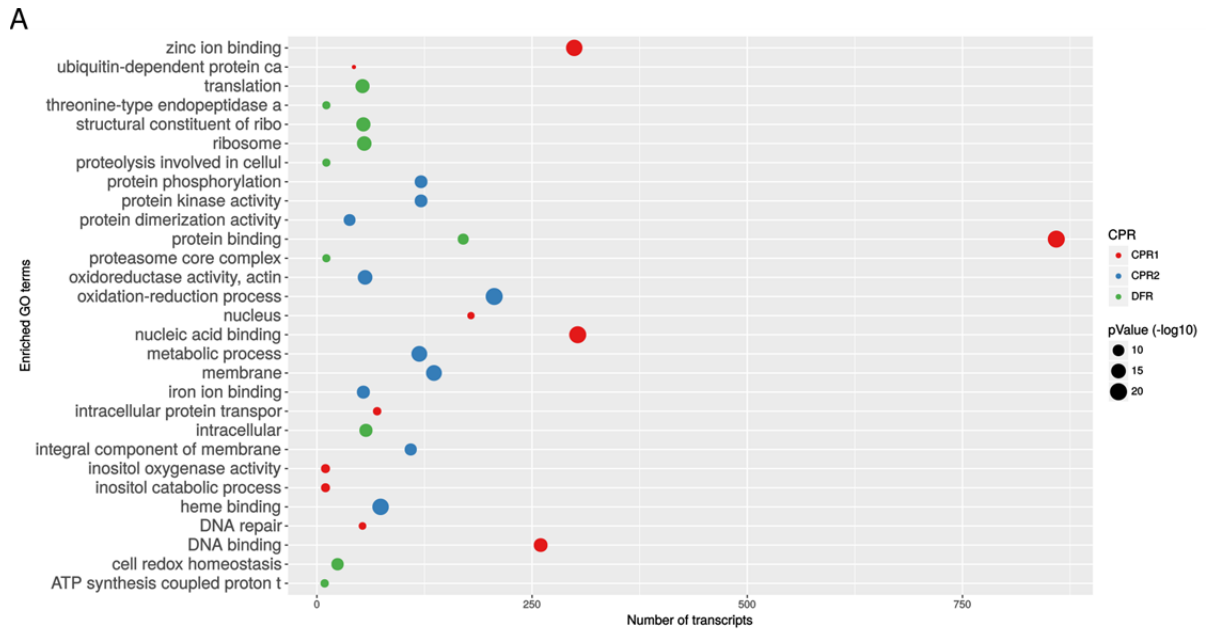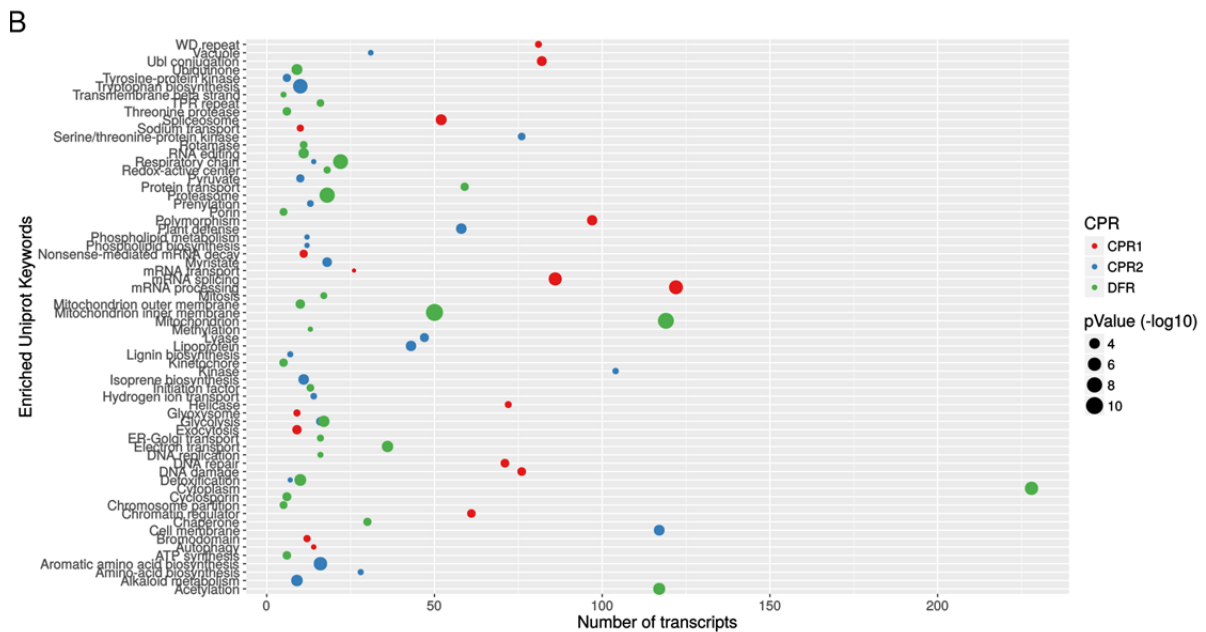

**Supplemental Figure 11. Functional classification of nearest co-expressed genes with *C. roseus* CPR.** (A). GO Molecular functions. GO terms were obtained after Pfam domain attribution with hmmerScan and with GO annotation in Uniprot. This graph presents for each CPR the 10 GO terms with more than 3 genes that were significantly enriched (hypergeometric distribution, FDR-adjusted p-value). (B). Keywords from Uniprot. Homologies to Uniprot entries were obtained by Blastx with the Uniprot database. Keywords from the resulting sequences were retrieved by mapping their names to the database (<http://www.uniprot.org/uploadlists/>).

| contig                             | CPR type         | consensus transcriptome (CDF97)     | MPRG database                                                                                                                                                               | Phytometasyn database                                                                                                                                                                  |
|------------------------------------|------------------|-------------------------------------|-----------------------------------------------------------------------------------------------------------------------------------------------------------------------------|----------------------------------------------------------------------------------------------------------------------------------------------------------------------------------------|
| contig CPR candidate 1             | CPR1 (Class I)   | SRR648705_TR44530_c0_g2_i2_len=2878 | cra_locus_2963_iso_4_2763_ver_3<br>cra_locus_2963_iso_9_2760_ver_3<br>cra_locus_2963_iso_2_2285_ver_3<br>cra_locus_2963_iso_1_2148_ver_3<br>cra_locus_2963_iso_8_2587_ver_3 | cro.CROLV1VD_velvet--Contig7081<br>cro.CROWL1VD_velvet--Contig5894<br>cro.CROAJ1VD_velvet--Contig11587<br>cro.CROWL1VD_velvet--Contig16079<br>cro.CRO1L1VD_velvet--Contig19083         |
| Original CPR (Meijer et al., 1993) | CPR2 (Class II)  | SRR648705_TR37292_c1_g1_i2_len=2917 | cra_locus_1734_iso_3_2168_ver_3<br>cra_locus_1734_iso_1_1343_ver_3<br>cra_locus_1734_iso_6_1219_ver_3<br>cra_locus_1734_iso_5_988_ver_3<br>cra_locus_1734_iso_2_709_ver_3   | cro.CROWL1VD_mira--CROWL1VD_rep_c2241<br>cro.CROLV1VD_velvet--Singlet39068<br>cro.CROLV1VD_velvet--Contig11364<br>cro.CROLV1VD_velvet--Contig11853<br>cro.CROLV1VD_velvet--Contig14514 |
| contig CPR candidate 2             | CPR3 (Class III) | SRR924148_TR33723_c0_g2_i1_len=2264 | cra_locus_17065_iso_1_1838_ver_3<br>cra_locus_17065_iso_3_1961_ver_3<br>cra_locus_17065_iso_1_1975_ver_3                                                                    | cro.CRO1L1VD_velvet--Singlet4709<br>cro.CRO1L1VD_velvet--Singlet66479<br>cro.CROWL1VD_velvet--Singlet981<br>cro.CROLV1VD_velvet--Singlet17019<br>cro.CRO1L1VD_velvet--Contig20495      |

**Supplemental Table 1.** Identification of contigs potentially encoding CPR candidates in the MPGR database (<http://medicinalplantgenomics.msu.edu/index.shtml>), phytometasyn database (<http://www.phytometasyn.ca/>) and in the *C.roseus* consensus transcriptome (Dugé de Bernonville et al., 2015a).

| Yeast Strain  | WATT 11 | WT303      | WT303       | WT303    | WT303  | WT303 |
|---------------|---------|------------|-------------|----------|--------|-------|
| Expressed CPR | ATR     | CPR1       | CPR2        | CPR3/DFR | hxCPR3 | none* |
| pYeDP60       | 0       | -          | -           | -        | -      | 0     |
| pYeDP60-T16H1 | 64.8    | 46         | 47.3        | 0        | 0      | 0     |
| pYeDP60-T16H2 | 83.1    | 60.9       | 60.2        | 0        | 0      | 0     |
| pYeDP60       | 0       | -          | -           | -        | -      | 0     |
| pYeDP60-C4H   | 72.2    | 55.3 ± 0.8 | 50.3 ± 1.61 | -        | -      | 24.1  |
| pYeDP60       | 0       | -          | -           | -        | -      | 0     |
| pYeDP60-SLS2  | 57.5    | 52.6       | 66.1        | 24       | 29     | 27    |
| pYeDP60       | 0       | -          | -           | -        | -      | 0     |
| pYeDP60-G10H  | 95      | 77.2       | 82.3        | -        | -      | 12    |

- : not tested ; \*basal CPR activity provided by the endogenous yeast CPR

**Supplemental Table 2. Evaluation of the efficiency of P450 reduction by CPR1, CPR2, CPR3/DFR, hxCPR3/DFR, the yeast endogenous CPR (WT303 yeast strain) and the codon-optimized ATR1 of the WAT11 yeast strain.** Substrate conversion rates (%) were determined using crude protein extract of WT303 yeast strain expressing each CPR/P450 pairs (C4H, SLS2, T16H1 and T16H2 assays) or microsomes (G8H assays) by addition of NADPH as electron donor. The hxCPR3 was created by fusion of the 74 first residues of CPR2 including the membrane spanning domain. Similar reactions were performed in the WAT11 yeast strain expressing the codon optimized ATR1 from Arabidopsis. Yeast endogenous CPR activity was also estimated by measuring P450 activity in similar conditions without expression of the periwinkle CPRs, and was subtracted from activities measured with CPR1 and CPR2. Control reactions aiming at evaluating the potential consumption of substrates by yeast endogenous enzymes were carried out using yeast strains transformed with the empty pYeDP60 vector. All assays were conducted independently 3 times with at least three technical replicates. nt, not tested.

**Supplemental Table 5. Primers used for cDNA cloning.**

| Primers        | Sequence                                                   | Applicatio                                                           | Restriction Site | Plasmid           |
|----------------|------------------------------------------------------------|----------------------------------------------------------------------|------------------|-------------------|
| CPRnewfor      | CTGAGA <u>ACT</u> AGTATGGAATCGAAGTTGGAGTTGGTGAG            |                                                                      | <i>SpeI</i>      | pSCA-YFP et SPYNE |
| CPRnewrev      | CTGAGA <u>ACT</u> AGTCCAGACGTCCTGAGATATCGTC                |                                                                      | <i>SpeI</i>      |                   |
| CPRoldfor      | CTGAGAGCTAGCATGGATTCTAGCTCGGAGAAGTTGTC                     |                                                                      | <i>NheI</i>      | pSCA-YFP et SPYNE |
| CPRoldrev      | CTGAGAGCTAGCCAGACATCTCGGAGATACCTTCC                        |                                                                      | <i>NheI</i>      |                   |
| CPR3pESC-For   | CTGAGA <u>ACT</u> AGTATGGAGGAGAAGCCGTACGAGGAGA             |                                                                      | <i>SpeI</i>      | pSCA-YFP et SPYNE |
| CPR3-YFP-Rev   | CTGAGA <u>ACT</u> AGT <u>AG</u> ACCAGGCTTCCACATGATACTTACCG |                                                                      | <i>SpeI</i>      |                   |
| G10Hfor        | CTGAGAAGATCTATGGATTACCTTACCATAATATTAAC                     |                                                                      | <i>BglII</i>     | SPYCE             |
| G10Hnosp_Rev   | CTGAGA <u>ACT</u> AGTAAAGGTTGCTTGGTACAGCA                  |                                                                      | <i>SpeI</i>      |                   |
| SLS2for        | CTGAGA <u>ACT</u> AGTATGGAGATGGATATGGATATCATTAGAAAAG       |                                                                      | <i>BglII</i>     | SPYCE             |
| SLS2rev        | CTGAGA <u>ACT</u> AGTAAAATCTGTCTCTCAAGCTTCTTGATAGATA       |                                                                      | <i>SpeI</i>      |                   |
| T16H1SpeI_FOR  | CTGAGA <u>ACT</u> AGTATGGAAATCTATTATTTTCTCTACTTGG          | <b>Full length ORF cloning , YFP fusion construct- BiFC analysis</b> | <i>SpeI</i>      | SPYCE             |
| T16H1nostREV   | CTGAGA <u>ACT</u> AGTAGCAGGAGAAGAGGAAGAAAAATTA             |                                                                      | <i>SpeI</i>      |                   |
| T16H2-YFPfor   | GCAGATCTATGGAGTTGTATTATTTTCCACCTTGGC                       |                                                                      | <i>BglII</i>     | SPYCE             |
| T16H2nostREV   | CTGAGA <u>ACT</u> AGTATATTACCTTTGAGAGAAGAAGCAG             |                                                                      | <i>SpeI</i>      |                   |
| C4Hfor         | CTGAGAAGATCTATGGATCTTCTCCTCTTAGAGAAGA                      |                                                                      | <i>BglII</i>     | SPYCE             |
| C4Hnost_REV    | CTGAGAAGATCTAAAAGTCCTAGGCTTGGATACAATA                      |                                                                      | <i>BglII</i>     |                   |
| helixCPR1-for  | CTGAGA <u>ACT</u> AGTATGGAAATCGAAGTTGGAGTTGGTGAG           |                                                                      | <i>SpeI</i>      | pSCA-YFP          |
| helixCPR1-rev  | CTGAGA <u>ACT</u> AGTCTCCGATCAGTCGATCTCTTCCATA             |                                                                      | <i>SpeI</i>      |                   |
| delCPR1        | CTGAGA <u>ACT</u> AGTATGAAAGAAACGAAGCCCGTGGTGT             |                                                                      | <i>SpeI</i>      | pSCA-YFP          |
| helixCPR2-for  | CTGAGA <u>TCT</u> AGAAATGGATTCTAGCTCGGAGAAGTTGTGC          |                                                                      | <i>XbaI</i>      | pSCA-YFP          |
| helixCPR2-rev  | CTGAGA <u>ACT</u> AGTTCGGGAAGATCGCCGCCATATC                |                                                                      | <i>SpeI</i>      |                   |
| delCPR2        | CTGAGAGCTAGCATGTCGGGTAAAAAAGTCGTGGAGCCT                    |                                                                      | <i>NheI</i>      | pSCA-YFP          |
| G10Hfor        | CTGAGAAGATCTATGGATTACCTTACCATAATATTAAC                     |                                                                      | <i>BglII</i>     | pYeDP60 -BamHI    |
| G10Hrev        | CTGAGAAGATCTTTAAAGGGTGCTTGGTACAG                           |                                                                      | <i>BglII</i>     |                   |
| SLS2-pYeEfor   | CTGAGAAGATCTATGGAGATGGATATGGATATCATTAGAAAAG                |                                                                      | <i>BglII</i>     | pYeDP60 – BamHI   |
| SLS2-pYeErev   | CTGAGAAGATCTTTAAAAATCTGTCTCTCAAGCTTCTTGATAGAT              |                                                                      | <i>BglII</i>     |                   |
| T16H1for       | CTGAGAAGATCTATGGAGTTGTATTATTTTCCACCTT                      |                                                                      | <i>BglII</i>     | pYeDP60 – BamHI   |
| T16H1rev       | CTGAGAAGATCTCTAATATTTACCTTTGAGAGAAGAAG                     |                                                                      | <i>BglII</i>     |                   |
| T16H2for       | GCAGATCTGATGGAATTCTATTATTTTCTCTACTTGGCC                    |                                                                      | <i>BglII</i>     | pYeDP60 – BamHI   |
| T16H2rev       | GCAGATCTCTAATATTTACCTTTGAGAGAAGAAGCAGAAT                   | <b>Yeast expression</b>                                              | <i>BglII</i>     |                   |
| C4Hfor         | CTGAGAAGATCTATGGATCTTCTCCTCTTAGAGAAGA                      |                                                                      | <i>BglII</i>     | pYeDP60 – BamHI   |
| C4Hrev         | CTGAGAAGATCTCTAAAAGTCCTAGGCTTGGATACA                       |                                                                      | <i>BglII</i>     |                   |
| CPRnew-pESCfor | CTGAGA <u>ACT</u> AGTATGGAATCGAAGTTGGAGTTGGTGAG            |                                                                      |                  | <i>SpeI</i>       |
| CPRnew-pESCrev | CTGAGA <u>ACT</u> AGTTCACCAGACGTCCTGAGATATCGTC             |                                                                      | <i>SpeI</i>      |                   |
| CPRold-pESCfor | CTGAGAGCTAGCATGGATTCTAGCTCGGAGAAGTTGTC                     |                                                                      | <i>NheI</i>      | pESC-Leu SpeI     |
| CPRold-pESCrev | CTGAGAGCTAGCTCACCAGACATCTCGGAGATACCTTCC                    |                                                                      | <i>NheI</i>      |                   |
| CPR3pESC-For   | CTGAGA <u>ACT</u> AGTATGGAGGAGAAGCCGTACGAGGAGA             |                                                                      | <i>SpeI</i>      | pESC-Leu SpeI     |
| CPR3pESC-Rev   | CTGAGA <u>ACT</u> AGTTTAAAGACCAGGCTTCCACATGATACTTACCG      |                                                                      | <i>SpeI</i>      |                   |
| helixCPR2-for  | CTGAGATCTAGAAATGGATTCTAGCTCGGAGAAGTTGTGC                   |                                                                      | <i>XbaI</i>      | pESC-Leu SpeI     |
| helixCPR2-rev  | CTGAGA <u>ACT</u> AGTTCGGGAAGATCGCCGCCATATC                |                                                                      | <i>SpeI</i>      |                   |
| CPR1fw         | GGCGCGAUAATCAACTGTGGCCTGAATTAG                             | <b>VIGS</b>                                                          |                  | pTRV2             |
| CPR1rev        | GGTTGCGAUTCTAAAGGTTGGCCATAAATTTTGC                         |                                                                      |                  |                   |
| CPR2fw         | GGCGCGAUCATCTTGGCCACGTATGGAG                               |                                                                      |                  |                   |
| CPR2rev        | GGTTGCGAUTGCTTCTGAAATAAGTGAATCTGA                          |                                                                      |                  |                   |

**Supplemental Table 5. Primers used for cDNA cloning.**

**Supplemental Table 6. Primers used for qPCR studies.**

| Primers        | Sequence                     | Application                                 |
|----------------|------------------------------|---------------------------------------------|
| qCPR1for       | ACTGAAAAGGCCGCCCAAGTA        |                                             |
| qCPR1rev       | CAGCAAACAATTTCTAGAAAGGAAGTGA |                                             |
| qCPR2for       | GCAGAAAAGGCTTCTGATATTTGGAGGA |                                             |
| qCPR2rev       | TTGGAACAGACGGAGGCAATACT      |                                             |
| qG10Hfor       | CATTTATTAGGCGACCAACC         |                                             |
| qG10Hrev       | GAACTTCTTTTCGCCATTGTT        |                                             |
| qSLS2for       | GGTCCATGTTCAGTAAAAGTCCAGTA   | <i>Gene expression in periwinkle organs</i> |
| qSLS2rev       | AACAAGGATCCCATGAAGTTGA       |                                             |
| qT16H1for      | GCCCAAACAGCCAATATTTCAAACC    |                                             |
| qT16H1rev      | ATGTGATGAGTATGGCCACCGC       |                                             |
| qT16H2for      | GATCAACTCACAGTGGCAGTC        |                                             |
| qT16H2rev      | GACTTGAGGACTTGTGATTGGC       |                                             |
| qC4Hfor        | CTAAGATTGATACTAGTGAGAAAAGGT  |                                             |
| qC4Hrev        | ACTCAAATCTGCAGCGGAGATTCA     |                                             |
| qRPS9 for      | TTACAAGTCCCTTCGGTGGT         |                                             |
| qRPS9 rev      | TGCTTATTCTTCATCCTCTTCATC     |                                             |
| qRTPCR-CPR1fw  | CTCTTGTGAAAGTGATTGACTTG      | <i>CPR silencing characterization</i>       |
| qRTPCR-CPR1rev | GAATGCTAAGGTCTCTTTCTTCAG     |                                             |
| qRTPCR-CPR2fw  | GGGAGCTAAATTAGATGGGTCTAACTC  |                                             |
| qRTPCR-CPR2rev | ACTGAAGTAGTCAAAATCATCACTAACT |                                             |
| qRTPCR-Rbps9fw | TTGAGCCGTATCAGAAATGC         |                                             |
| qRTPCR-Rbps9rv | CCCTCATCAAGCAGACCATA         |                                             |

**Supplemental Table 6. Primers used for qPCR analyses.**

## Supplemental Material - VIGS

For silencing experiments the pTRV2u vector was transformed with a short section of the target gene (see below). For CPR2 VIGS constructs, a 400 bp section was chosen of the open reading frame, and for *CPR1* a 373 bp long section was chosen. The nucleotide sequence of these inserts is shown below with the primer regions highlighted in yellow.

>VIGS\_CPR1 (construct a)

ATCAACTGTGGCCTGAATTAGATCAAATACTCAGAGATGAGGATGATATGATCTCTGTTTCCACCCATATACAGCTGCAATCAATGAATACCGAGTAGTGATTCATGATTCTTTGGATACACCATACGAAGATAAGCAGTTAAACGGGGCTAATGGAAATCTTTCATATGATATTCATCATCCATGCATAGTTACTGTTGCGGTTCAAAAAGAGCTTCACAAACCTGAATCCGATCGTTCATGCATTCACCTGGAATTTGATATTCTGGAACAGGCATCCAATATGAAACTGGAGATCATGTGGGGGTATATGCTGAAAATTGTGATGAAAATGTTGAAGAAGCAGCAAAAATTATTAGGCCAACCTTTAGA

>VIGS\_CPR2 (construct a)

CATCTTGGCCACGTATGGAGATGGTGAGCCAACCGACAATGCTGCAAGGTTCTACAAATGGTTTGTAGAGGGAAATGATAGAGGGGACTGGCTAAAGAATCTGCAATATGGAGTTTTTGGCCTTGGTAACAGACAATATGAGCATTTCACAAGATTGCTAAAGTGGTGGATGAGAAAGTTGCTGAACAGGGTGGTAAGCGGATTGTTCCATTGGTTCTGGGAGACGATGACCAGTGCATTGAAGATGACTTTGCTGCATGGCGTGAGAATGTATGGCCTGAGTTGGATAACTTGTCCGGGATGAGGATGATACAACCTGTTTCTACAACCTACACTGCTGCTATTCCAGAATATCGTGTGTGTTCCCTGACAAAACAGATTCACTTATTTTCAGAAGCA

The two *CPR* genes share 68.9% identity at the nucleotide level. Alignment of the sections chosen for constructs show that some sequence identity could not be avoided due to the similarity of both genes. Sequence identity for the *CPR2* VIGS fragment to the corresponding region of the *CPR1* gene was 71.2%, and conversely, the identity of the *CPR1* VIGS fragment with the *CPR2* gene was 65.4%. The longest identical section of the *CPR2* VIGS section to the *CPR1* gene is a single stretch of 17 bp that should not cause cross-silencing.

>Nucleotide alignment 2 Alignment of 2 sequences: CPR1 (ORF), CPR2 (VIGS ORF)

Score = 931.0, Identities = 277/389 (71%),  
Positives = 277/389 (71%), Gaps = 3/389 (0%)

```
CPR1 (ORF)      579 CATGGTGGCAACGTATGGAGATGGAGAGCCAACCTGATAATGCTGCTAGGTTTTATAAATG 638
                  CAT  TGGC  ACGTATGGAGATGG  GAGCCAAC  GA  AATGCTGC  AGGT  TA  AAATG
CPR2 (VIGS ORF)  1  CATCTTGGCCACGTATGGAGATGGTGAGCCAACCACAAATGCTGCAAGGTCTACAAATG  60

CPR1 (ORF)      639 GTTACTGAGGGAAAAGAGAGGGAGCCATGGCTTCAGCAACTCACATATGGTGTATTTGG 698
                  GTTT  GAGGGAAA  GA  AG  G  G  TGGCT  AG  A  CT  ATATGG  GT  TTTGG
CPR2 (VIGS ORF)  61  GTTTGTAGAGGGAAATGATAGAGGGGACTGGCTAAAGAATCTGCAATATGGAGTTTTTTGG 120

CPR1 (ORF)      699 TTTGGGTAACCGTCAATATGAGCATTTCATAAAGATTGGGAAGGTAATCGATGAGCAACT 758
                  T  GGTAAC  G  CAATATGAGCATTTCAA  AAGATTG  AA  GT  T  GATGAG  AA  T
CPR2 (VIGS ORF)  121 CCTTGGTAACAGACAATATGAGCATTTCACAAGATTGCTAAAGTGGTGGATGAGAAAAGT 180

CPR1 (ORF)      759 CAGTCAACAAGGTGCAAAAAGATTGGTTCAGCTCGGTCTTGGGGATGATGATCAATGTAT 818
                  T  AACA  GGTG  AA  G  T  GTTC  T  G  TCT  GG  GA  GATGA  CA  TG  AT
CPR2 (VIGS ORF)  181 TGCTGAACAGGGTGGTAAGCGGATTGTTCCATTGGTCTGGGAGACGATGACCAGTGCAT 240

CPR1 (ORF)      819 CGAGGATGATTTTGTCTGCTTGGCGGGATCAACTGTGGCCTGAATTAGATCAAATACTCAG 878
                  GA  GATGA  TTTGCTGC  TGGCG  GA  A  T  TGGCCTGA  TT  GAT  A  T  CTC  G
CPR2 (VIGS ORF)  241 TGAAGATGACTTTTGTGTCATGGCGTGAGAAATGTATGGCCTGAGTTGGATAACTTGGCTCCG 300

CPR1 (ORF)      879 AGATGAGGATGATATGATCTCTGTTTCCACCCATATACAGCTGCAATCAATGAATACCG 938
                  GATGAGGATGATA  A  CTGTTT  AC  C  TA  AC  GCTGC  AT  GAATA  CG
CPR2 (VIGS ORF)  301 GGATGAGGATGATACAAA---CTGTTTCTACAACCTACACTGCTGCTATTCCAGAATATCG 357

CPR1 (ORF)      939 AGTAGTGATTCATGATTCCTTTGGATACAC 967
                  GT  GTG  T  C  TGA  T  GAT  CAC
CPR2 (VIGS ORF)  358 TGTGTGTCCCTGACAAATCAGATTCAC 386
```

>Nucleotide alignment Alignment of 2 sequences: CPR2 (ORF), CPR1 (VIGS ORF)

Score = 665.0, Identities = 236/361 (65%),  
Positives = 236/361 (65%), Gaps = 12/361 (3%)

```
CPR2 (ORF)      838 TATGGCCTGAGTTGGATAAAGTCTCCGGGATGAGGATGATACAAA---CTGTTTCTACAA 894
                  T  TGGCCTGA  TT  GAT  A  T  CTC  G  GATGAGGATGATA  A  CTGTTT  AC
CPR1 (VIGS ORF)  7  TGTGGCCTGAATTAGATCAAATACTCAGAGATGAGGATGATATGATCTCTGTTTCCACCC  66

CPR2 (ORF)      895 CCTACACTGCTGTATTCCAGAATATCGTGTGTGTTCCCTGACAAATCAGATTCACCTTA 954
                  C  TA  AC  GCTGC  AT  GAATA  CG  GT  GTG  T  C  TGA  T  GAT  CAC
CPR1 (VIGS ORF)  67  CATATACAGCTGCAATCAATGAATACCGAGTAGTGATTGATTCCTTTGGATACAC--- 123

CPR2 (ORF)      955 TTTCAGAAGCAAATGGCCATGCCAATGGTTATGCTAATGGCAACACCGTATATGATGCC 1014
                  CA  A  G  A  AT  CA  AA  GG  GCTAATGG  AA  ATATGAT  C
CPR1 (VIGS ORF)  124 ---CATACGAAGATAAGCAGTTAAACGGG---GCTAATGGAAATCTTTTCATATGATATTC 177

CPR2 (ORF)      1015 AGCATCCTTGCAGATCTAATGTTGAGTGAGGAAGGAGCTTCATACTCCAGCATCTGATC 1074
                  A  CATCC  TGCA  A  TA  TGTTC  GT  AA  GAGCTTCA  A  CC  G  ATC  GATC
CPR1 (VIGS ORF)  178 ATCATCCATGCATAGTTACTGTTGCGGTTCAAAAAGAGCTTCACAAACCTGAATCCGATC 237

CPR2 (ORF)      1075 GTTCTTGACCCATTTGGATTTTGACATTGCTGGCACTGGCCTTTCATATGGAAGTGGAG 1134
                  GTTC  TGCA  CA  TGGA  TTTGA  ATT  CTGG  AC  GGC  T  ATATG  AACTGGAG
CPR1 (VIGS ORF)  238 GTTCATGCATTCACCTGGAATTTGATATTTCTGGAACAGGCATCCAATATGAAAGTGGAG 297

CPR2 (ORF)      1135 ATCATGTGAGGTGACTGTGATAATCTATCTGAAACCGTGGAGGAGCTGAGAGATTAC 1194
                  ATCATGT  GG  GT  TA  TGA  AAT  TGAAA  GT  GA  GA  GC  G  A  ATTA
CPR1 (VIGS ORF)  298 ATCATGTGGGGTATATGCTGAAAATTGTGATGAAAATGTTGAAGAAGCAGCAAATAT 357

CPR2 (ORF)      1195 T 1195
                  T
CPR1 (VIGS ORF)  358 T 358
```



Eight week old seedlings of *C. roseus* variety "SunStorm Apricot" (Syngenta) were used for all VIGS experiments. All plants were grown in a walk in growth chamber at 25°C under a 12 h light/12 h dark regime using the John Innes compost mix No.2 (peat based). Stems of plants were pinched just under the last emerging fresh pair of leafs and tissue harvested 21 days later. The harvested material, approximately 50 mg of the latest emerging leaf pair, was frozen in liquid nitrogen, milled (RETSCH mill, Germany) and the sample divided into two fractions, one for RNA extraction and one for LCMS measurement.

The metabolite profile of silenced leaves was assessed by LCMS. Between 10-25 mg of ground tissue of each plant was weighed, collected into 200 µl methanol and incubated at 57 °C for 2 hr. After a 30 minute centrifugation step at 5,000 x g an aliquot of the supernatant, mixed with an equal volume of water, was analysed by LC-MS. A Shimadzu LCMS-IT-TOF Mass Spectrometer was used with a Phenomenex Kinetix 5µ C18 100A (100 × 2.10 mm, 5 µm) column using a binary solvent system consisting of acetonitrile (ACN) and 0.1% formic acid in water. The elution program was the following: a 5 min gradient from 10% up to 25% ACN, a 1 min gradient up to 100% ACN, 1.5 min isocratic at 100% ACN, 0.5 min down to at 10% ACN, 2min isocratic at 10% ACN. To assess changes to alkaloid production levels the four alkaloids vindoline, vindorosine, serpentine and catharanthine were chosen. The four compounds represent the end products of the individual alkaloid class branches in *C. roseus* leaf tissue and accumulate to relatively high levels in wild type leaf tissue.

Automated peak detection and extraction of 7 EV samples, as well as 8 samples for CPR1 and CPR2 was conducted using the profiling solutions software (Shimadzu) with standard extraction parameters.

To assess the level of silencing, material from six independently silenced plants was compared to six plants treated with the empty vector control plasmid. The q RT PCR reaction was performed in technical duplicate. **All q RT PCR primers were tested to ensured optimal efficiency. All melting curves generated in each experiment were analyzed to ensure that the primer pair is specific. RNA and water controls were included in the measurements in triplicate. The cDNA concentration was optimized according to the results of the primer testing to ensure that the Cq value for each gene analysed in the experiment would at between 20-30 cycles.** The relative quantification of gene expression was calculated using the expression values of a reference gene for normalisation of the data. Reference gene was in all cases the *40S Ribosomal protein 9 (Rps9)*. **All q RT PCR measurements were done using the CFX96 touch Real-Time PCR system (BioRad) and the SYBR Green I dye. Each reaction was performed in a total volume of 25 µl consisting of a normalized concentration of cDNA, 0.2 mM of appropriate forward and reverse primer and the SsoAdvanced SYBR Green Supermix (BioRad, cat. No: 1725271) that contains dNTPs, Sso7d fusion polymerase, MgCl<sub>2</sub>, SYBR® Green I and ROX normalization dyes. The qPCR reaction was initiated by a denaturation step at 95 °C for 10 min followed by 40 cycles at 95 °C for 15 s and 60 °C for 1 min. The resulting data was analyzed using the CFX software. The previously determined efficiency for the primer (100.8% for CPR 2 and 101.0% for CPR 1) was considered in this calculation.**

Three independent VIGS experiments were conducted and results were consistent among all experiments (albeit with varying statistical significance). Each silencing experiment consisted of plants silenced for CPR1 and CPR2 and included an equal amount of plants treated with an EV control. Between 7 and 8 plants were assessed for each silencing experiment.
